# Supplementary figures and images for: rps3 as a Candidate Mitochondrial Gene for the Molecular Identification of Species from the Colletotrichum acutatum Species Complex
Source: MDPI journal article supplement (doi:10.3390/genes11050552), 2020-05-14

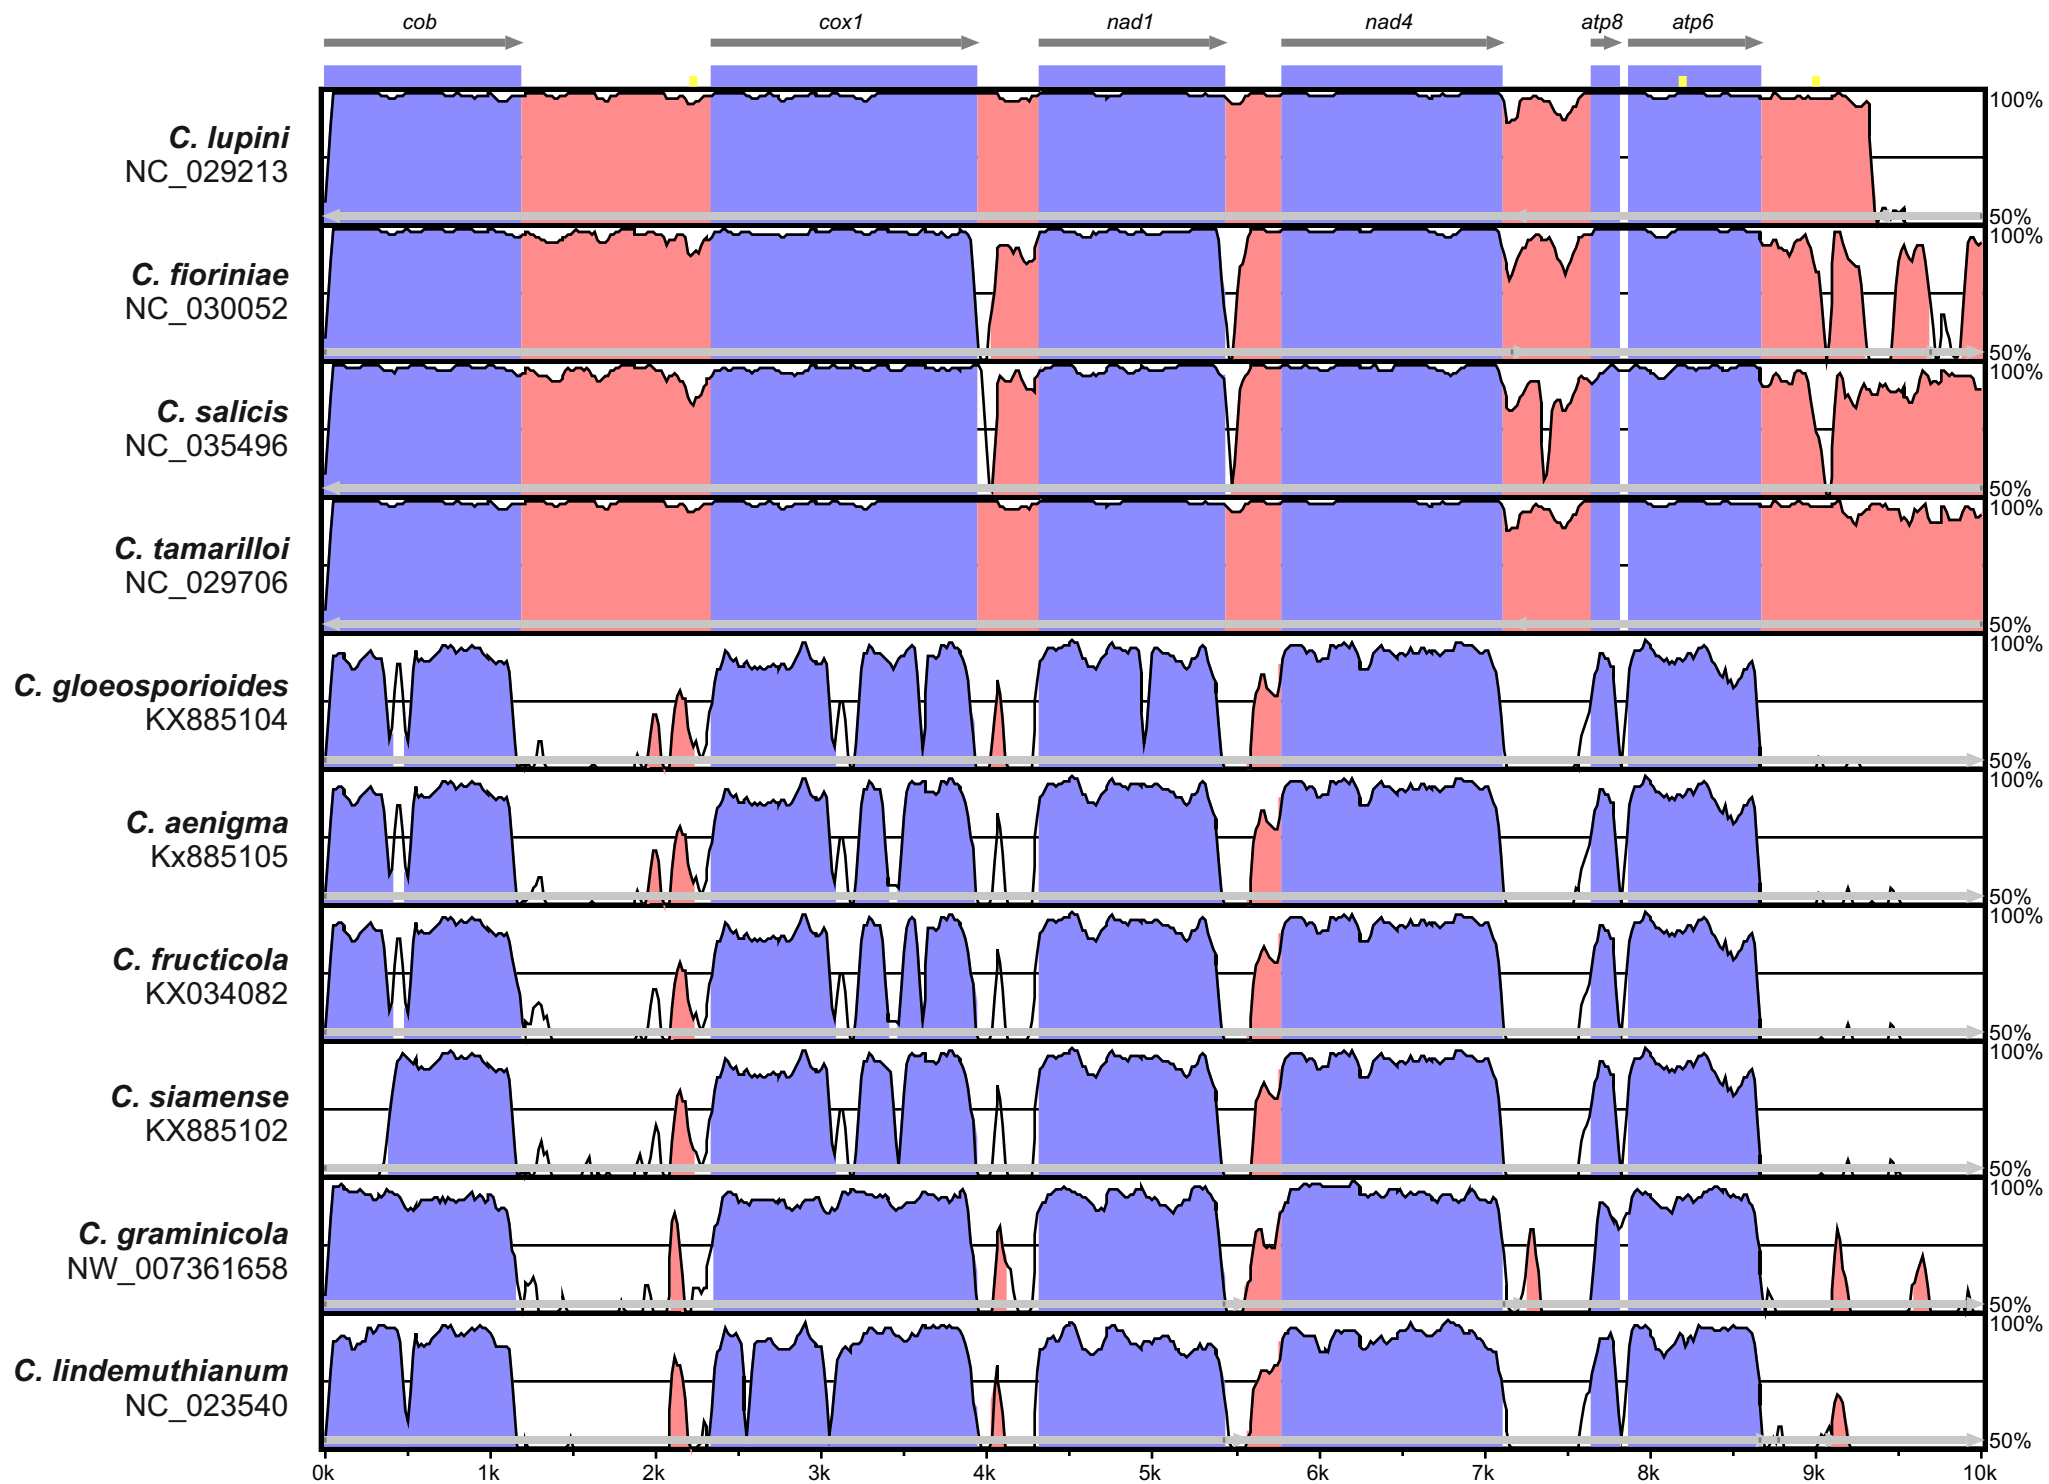

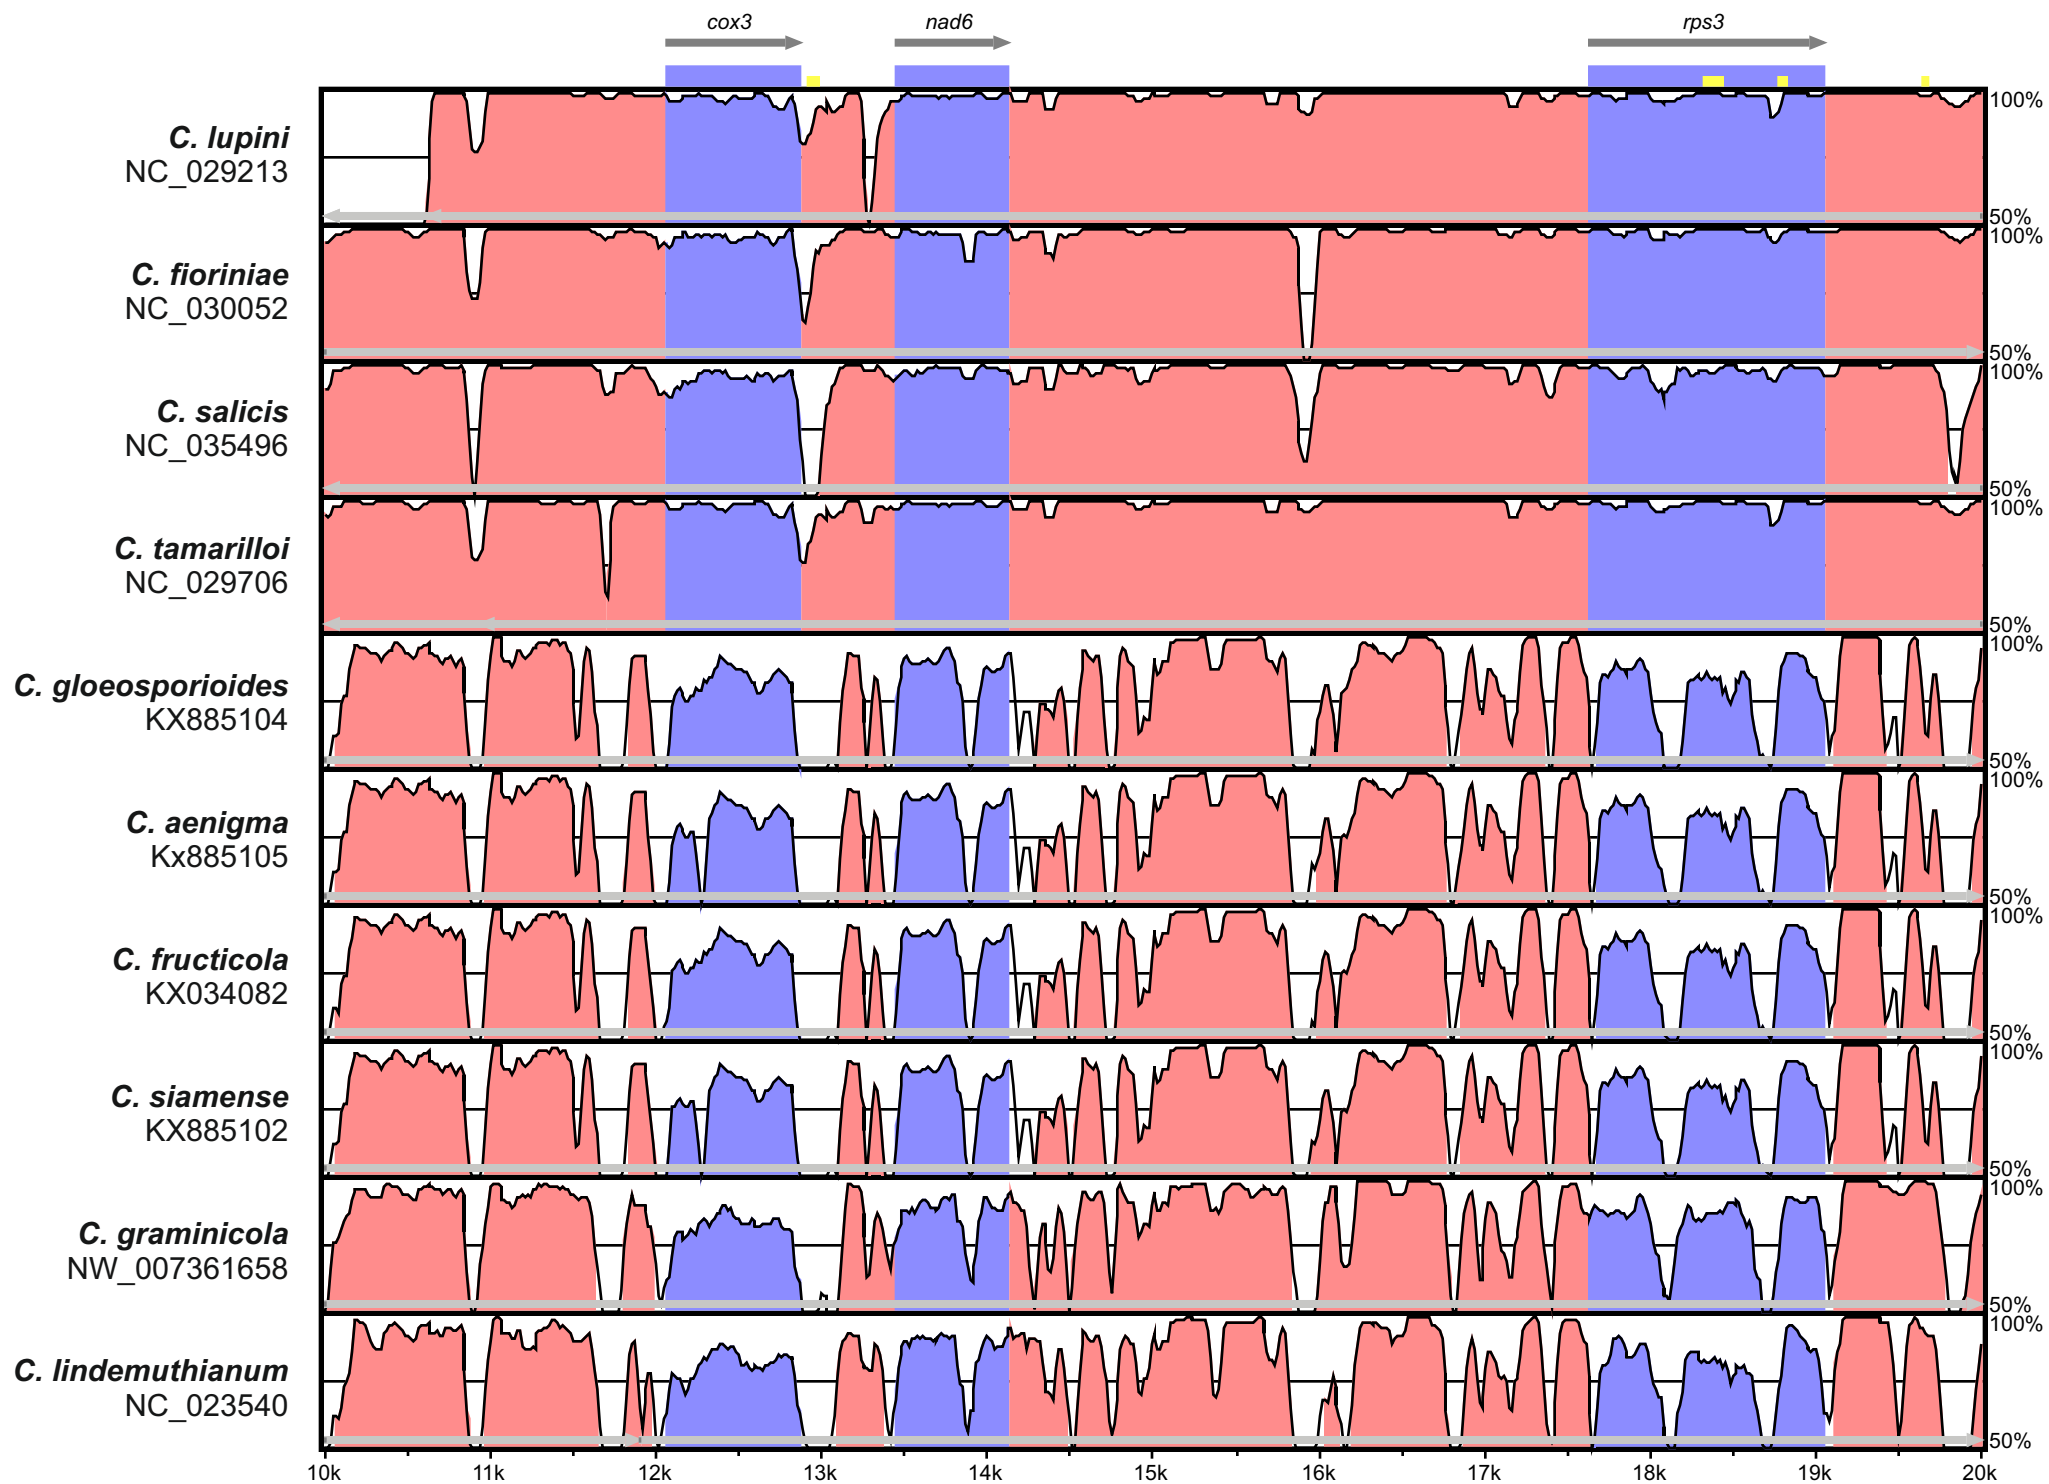

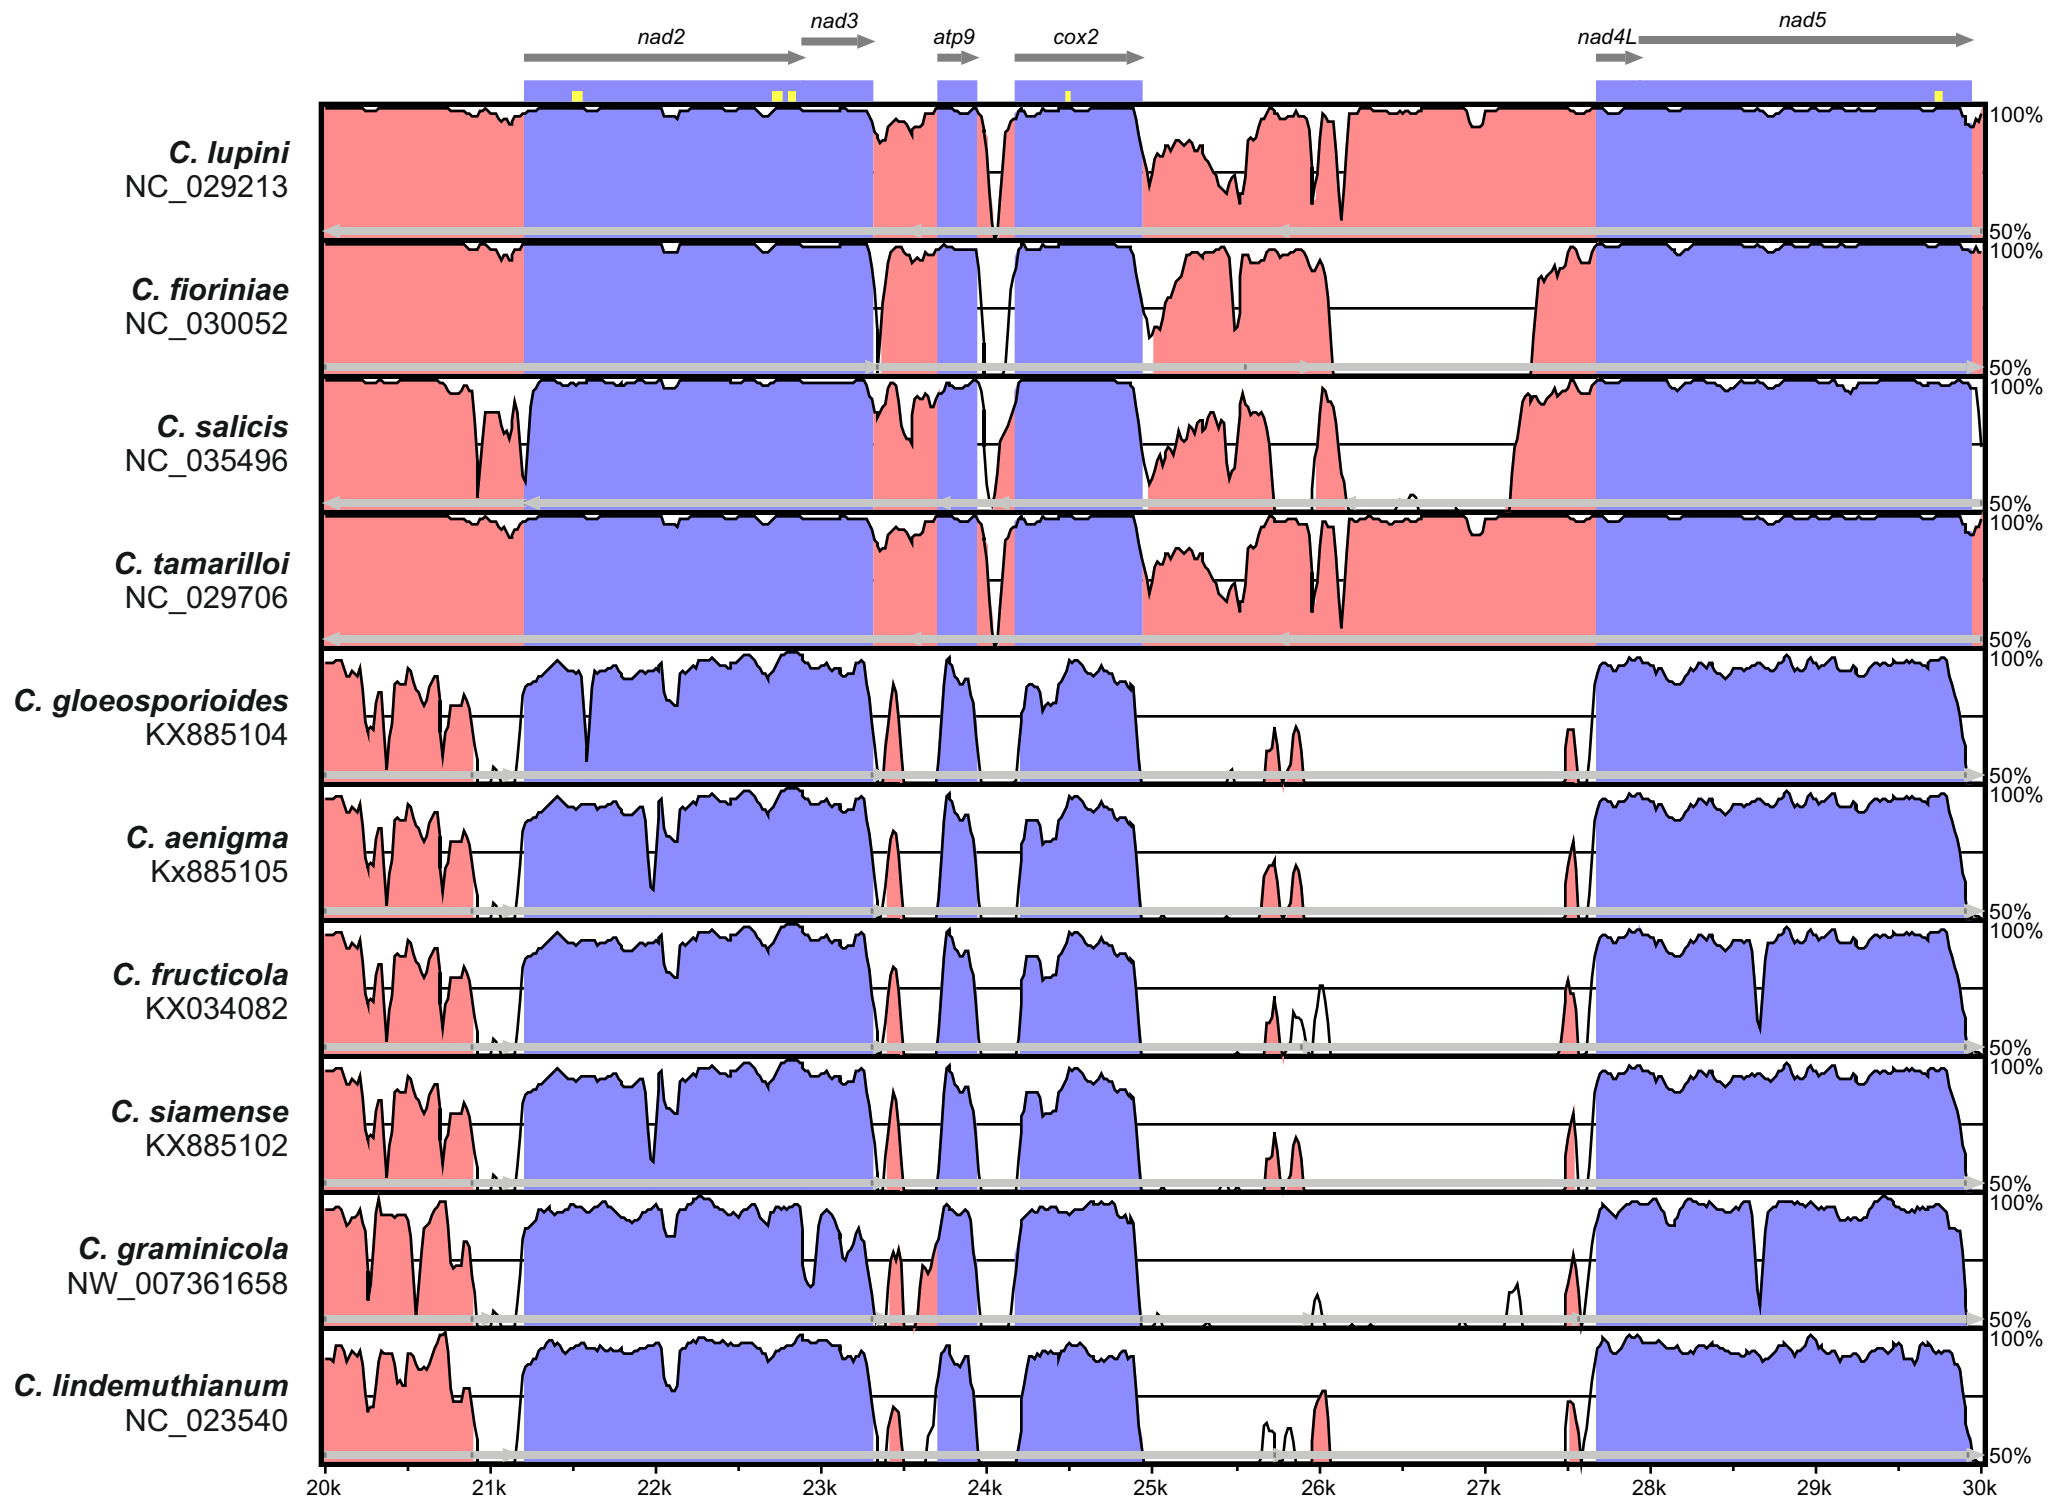

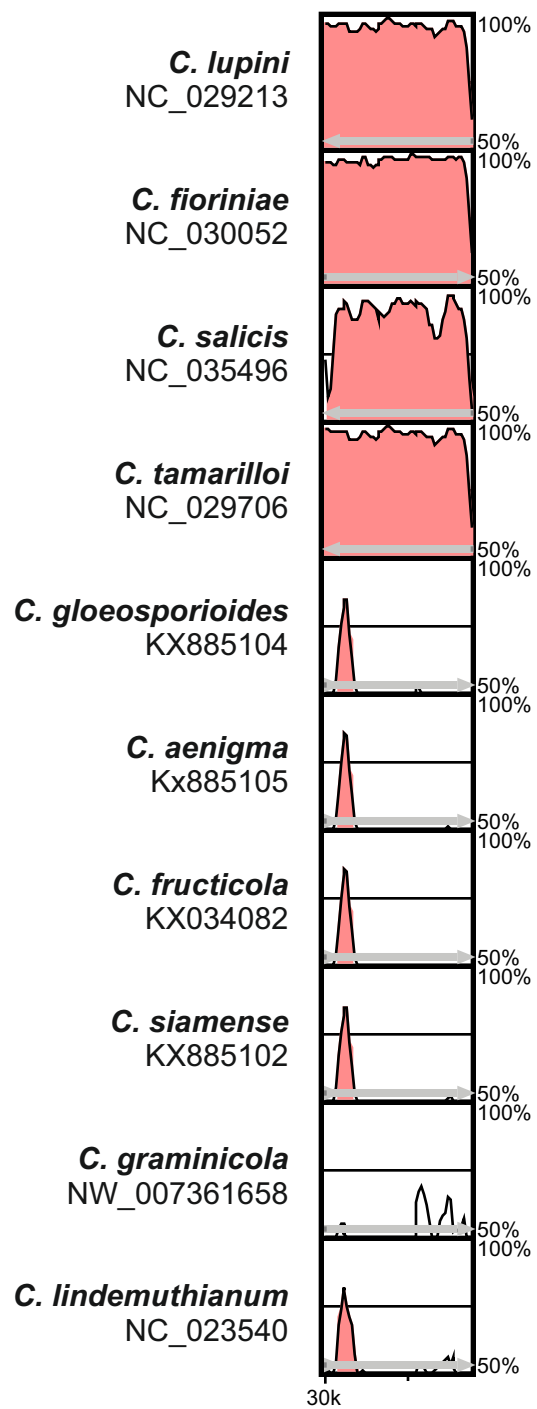

Supplement: s1 [file s1]

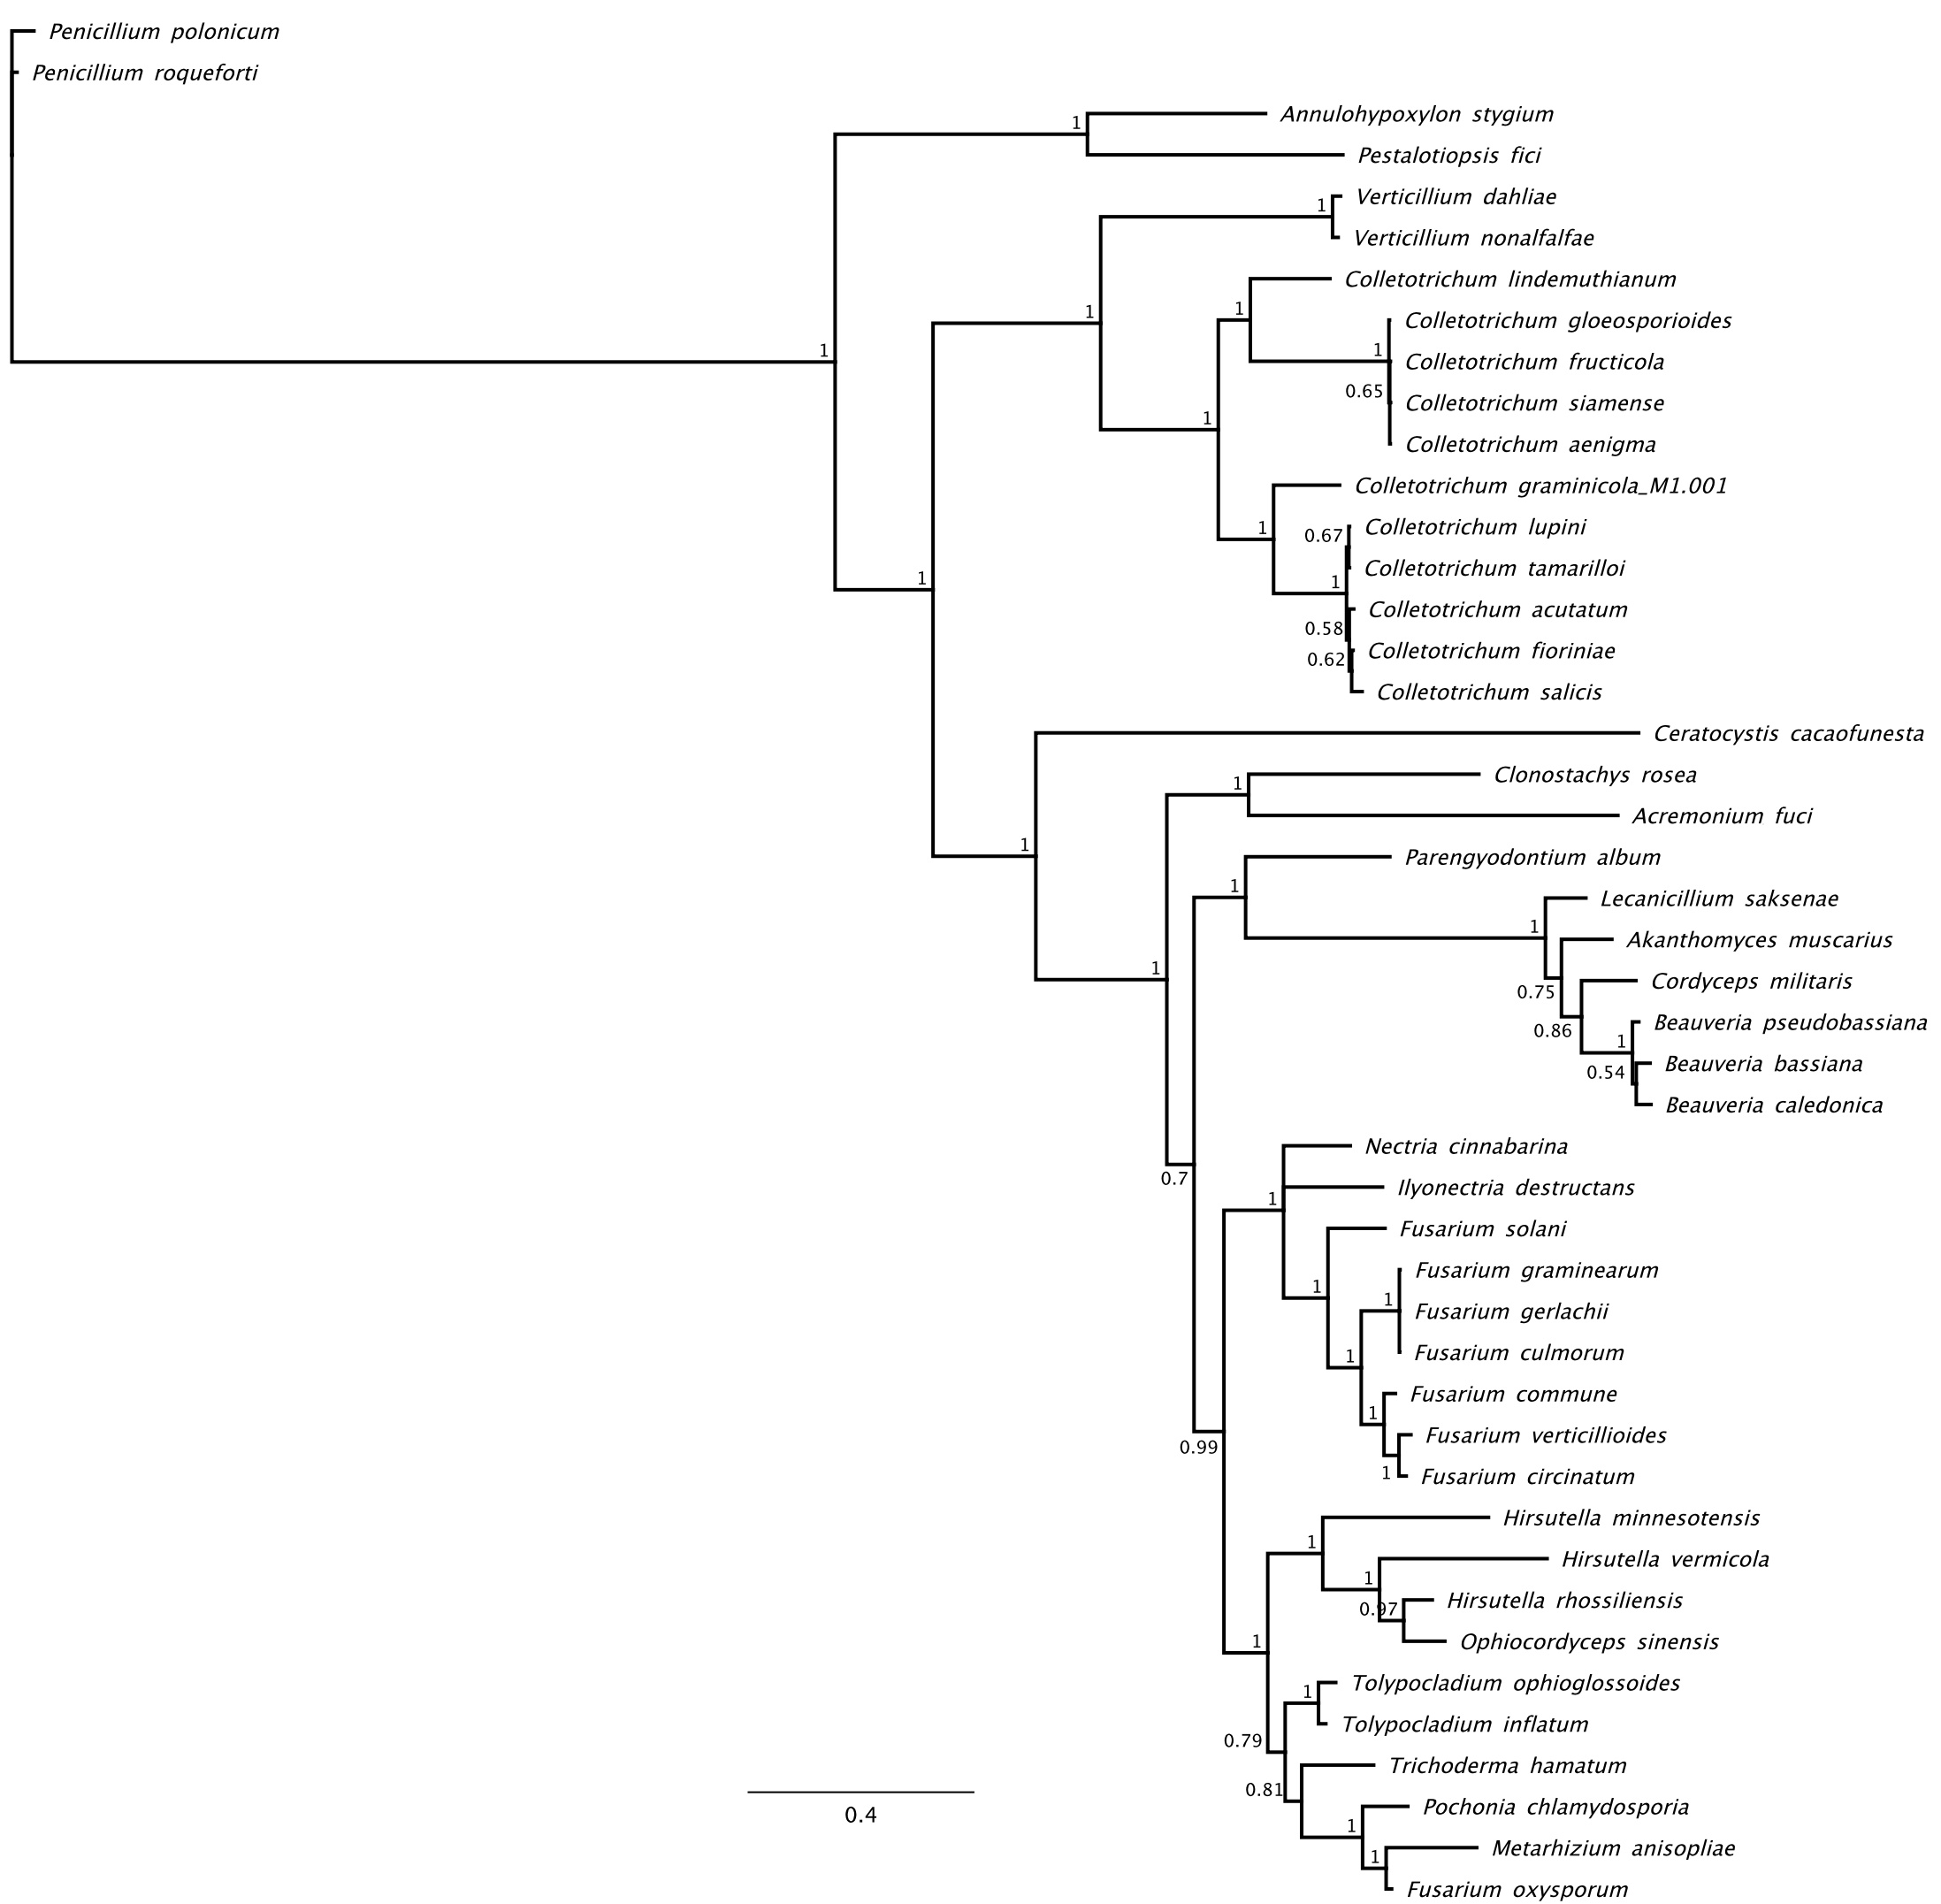

Supplement: s1 [file s1]
